# Supplementary material for: Social signals and algorithmic trading of Bitcoin
Source: PubMed Central journal article supplement (PMC4593685; doi:10.1098/rsos.150288), 2015-09-23
Supplement: rsos150288supp1.pdf [file rsos150288supp1.pdf]

# Trading and social signals in the Bitcoin ecosystem

David Garcia and Frank Schweitzer

14.08.2015

## Signals of the Bitcoin ecosystem

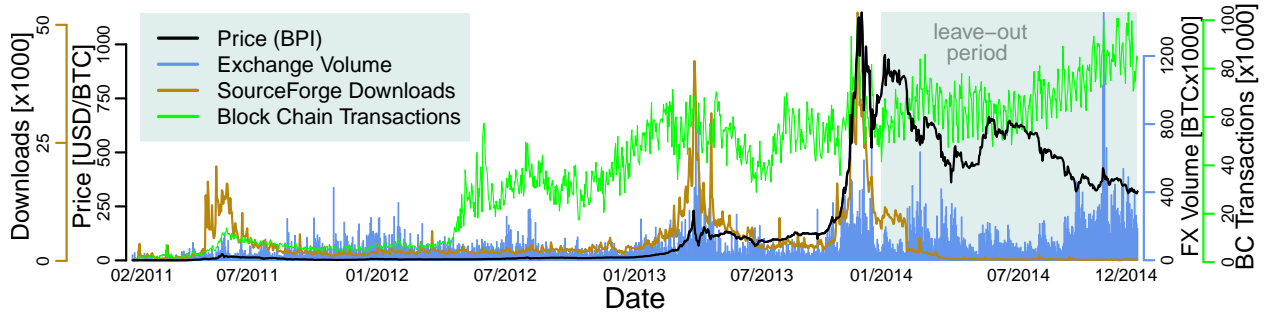

Figure 1: Time series of Bitcoin Price Index, FX Volume, amount of transactions in the Block Chain, and Bitcoin client downloads.

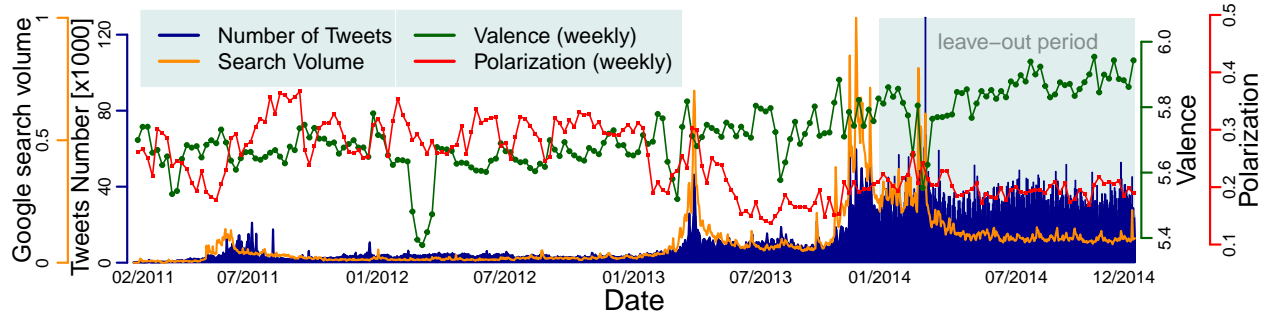

Figure 2: Time series of Bitcoin-related tweets, polarization, valence, and Google search volume.

| FXVolume  | BC Transactions | Downloads | Tweets   |
|-----------|-----------------|-----------|----------|
| 152439477 | 55210262        | 5449105   | 19578671 |

Table 1: Summary of dataset sizes.

## Stationarity tests

| signal         | ADF         | ADFpval   | PP            | PPpval    | KSP        | KSPpval   | AR        |
|----------------|-------------|-----------|---------------|-----------|------------|-----------|-----------|
| Tweets         | -7.7559748  | 0.0000000 | -101.9368658  | 0.0100000 | 5.5212865  | 0.0100000 | 0.9135424 |
| Polarization   | -7.9836833  | 0.0000000 | -158.1479700  | 0.0100000 | 4.6718462  | 0.0100000 | 0.8584331 |
| Valence        | -12.1639828 | 0.0000000 | -493.8340651  | 0.0100000 | 2.8230069  | 0.0100000 | 0.6489829 |
| Transactions   | -8.2131394  | 0.0000000 | -125.7243099  | 0.0100000 | 12.0026714 | 0.0100000 | 0.9999990 |
| ExchangeVolume | -11.9483558 | 0.0000000 | -475.7609587  | 0.0100000 | 2.6769065  | 0.0100000 | 0.6586341 |
| Downloads      | -5.8322548  | 0.0000037 | -43.3071791   | 0.0100000 | 2.6960804  | 0.0100000 | 0.9992237 |
| Search         | -6.7051727  | 0.0000000 | -41.1135810   | 0.0100000 | 3.9321100  | 0.0100000 | 0.9994038 |
| BPI            | -0.8243950  | 0.9619119 | -3.5448747    | 0.9096929 | 4.3478948  | 0.0100000 | 0.9979938 |
| Return         | -22.6856583 | 0.0000000 | -1044.5997512 | 0.0100000 | 0.1824587  | 0.1000000 | 0.0721432 |

Table 2: Stationarity tests for time series of levels and Return

| signal                  | ADF         | ADFpval   | PP            | PPpval    | KSP       | KSPpval   | AR         |
|-------------------------|-------------|-----------|---------------|-----------|-----------|-----------|------------|
| $\Delta$ Tweets         | -30.9634468 | 0.0000000 | -833.1857606  | 0.0100000 | 0.0430182 | 0.1000000 | -0.1391233 |
| $\Delta$ Polarization   | -31.5239392 | 0.0000000 | -1023.3434173 | 0.0100000 | 0.0146565 | 0.1000000 | -0.2593133 |
| $\Delta$ Valence        | -38.7433909 | 0.0000000 | -1091.8257832 | 0.0100000 | 0.0107607 | 0.1000000 | -0.3310941 |
| $\Delta$ Transactions   | -31.0196706 | 0.0000000 | -883.7768285  | 0.0100000 | 0.0155640 | 0.1000000 | -0.1592976 |
| $\Delta$ ExchangeVolume | -32.3629574 | 0.0000000 | -1109.4614927 | 0.0100000 | 0.0082475 | 0.1000000 | -0.3398761 |
| $\Delta$ Downloads      | -25.7994780 | 0.0000000 | -735.7927756  | 0.0100000 | 0.0154578 | 0.1000000 | 0.0783164  |
| $\Delta$ Search         | -27.9643026 | 0.0000000 | -569.5286792  | 0.0100000 | 0.0265053 | 0.1000000 | 0.1654444  |

Table 3: Stationarity tests for time series of first order differences

# Vector Auto-Regression

## Response of Return

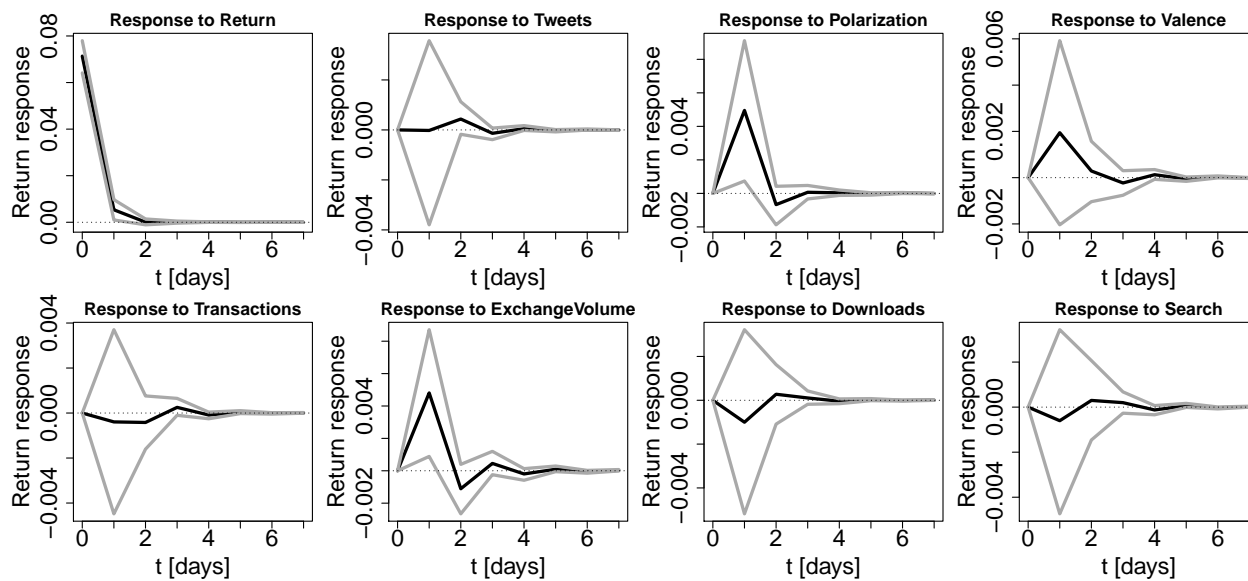

|                     | VAR(1)               | VAR(opt)             |
|---------------------|----------------------|----------------------|
| Return.l1           | <b>0.09</b> (0.03)** | <b>0.09</b> (0.03)** |
| Tweets.l1           | 0.00 (0.00)          | 0.00 (0.01)          |
| Polarization.l1     | <b>0.00</b> (0.00)*  | <b>0.00</b> (0.00)*  |
| Valence.l1          | 0.00 (0.00)          | 0.00 (0.00)          |
| Transactions.l1     | -0.00 (0.00)         | -0.00 (0.00)         |
| ExchangeVolume.l1   | <b>0.01</b> (0.00)*  | <b>0.01</b> (0.00)** |
| Downloads.l1        | -0.00 (0.00)         | -0.00 (0.00)         |
| Search.l1           | -0.00 (0.00)         | -0.00 (0.00)         |
| const               | 0.01 (0.00)          | 0.01 (0.00)          |
| trend               | 0.00 (0.00)          | 0.00 (0.00)          |
| Return.l2           |                      | -0.01 (0.03)         |
| Tweets.l2           |                      | 0.00 (0.01)          |
| Polarization.l2     |                      | -0.00 (0.00)         |
| Valence.l2          |                      | 0.00 (0.00)          |
| Transactions.l2     |                      | -0.00 (0.00)         |
| ExchangeVolume.l2   |                      | 0.00 (0.00)          |
| Downloads.l2        |                      | 0.00 (0.00)          |
| Search.l2           |                      | -0.00 (0.00)         |
| R <sup>2</sup>      | 0.02                 | 0.02                 |
| Adj. R <sup>2</sup> | 0.01                 | 0.00                 |
| Num. obs.           | 1065                 | 1064                 |
| RMSE                | 0.07                 | 0.07                 |

\*\*\*  $p < 0.001$ , \*\*  $p < 0.01$ , \*  $p < 0.05$

Table 4: Results for Return equation

## Response of Number of tweets

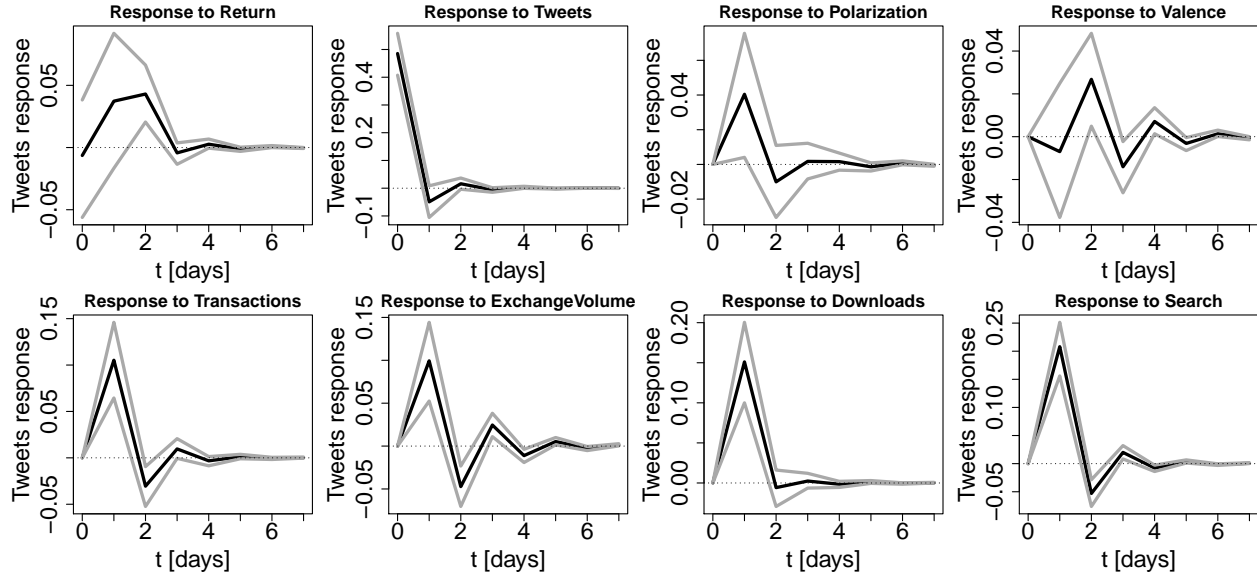

|                     | VAR(1)                 | VAR(opt)               |
|---------------------|------------------------|------------------------|
| Return.l1           | <b>0.64</b> (0.21)**   | <b>0.66</b> (0.20)**   |
| Tweets.l1           | <b>-0.50</b> (0.03)*** | <b>-0.55</b> (0.04)*** |
| Polarization.l1     | -0.01 (0.01)           | -0.01 (0.01)           |
| Valence.l1          | -0.01 (0.01)           | -0.01 (0.01)           |
| Transactions.l1     | <b>0.07</b> (0.02)***  | <b>0.06</b> (0.02)***  |
| ExchangeVolume.l1   | 0.03 (0.02)            | <b>0.07</b> (0.02)***  |
| Downloads.l1        | 0.02 (0.02)            | 0.02 (0.02)            |
| Search.l1           | <b>0.36</b> (0.03)***  | <b>0.36</b> (0.02)***  |
| const               | -0.01 (0.03)           | -0.01 (0.03)           |
| trend               | 0.00 (0.00)            | 0.00 (0.00)            |
| Return.l2           |                        | 0.09 (0.21)            |
| Tweets.l2           |                        | <b>-0.26</b> (0.03)*** |
| Polarization.l2     |                        | 0.01 (0.01)            |
| Valence.l2          |                        | 0.01 (0.01)            |
| Transactions.l2     |                        | 0.01 (0.02)            |
| ExchangeVolume.l2   |                        | <b>0.08</b> (0.02)***  |
| Downloads.l2        |                        | 0.01 (0.02)            |
| Search.l2           |                        | -0.04 (0.03)           |
| R <sup>2</sup>      | 0.30                   | 0.38                   |
| Adj. R <sup>2</sup> | 0.30                   | 0.37                   |
| Num. obs.           | 1065                   | 1064                   |
| RMSE                | 0.49                   | 0.46                   |

\*\*\*  $p < 0.001$ , \*\*  $p < 0.01$ , \*  $p < 0.05$

Table 5: Results for Tweets equation

## Response of Polarization

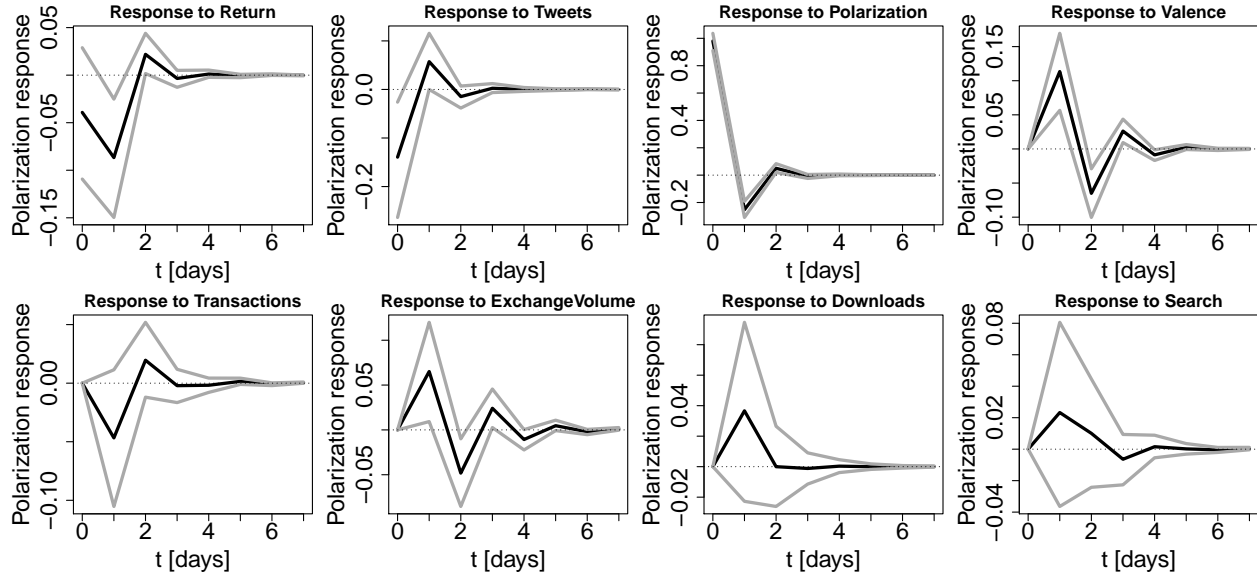

|                     | VAR(1)                 | VAR(opt)               |
|---------------------|------------------------|------------------------|
| Return.l1           | <b>-1.17</b> (0.44)**  | <b>-1.06</b> (0.43)*   |
| Tweets.l1           | 0.03 (0.07)            | 0.06 (0.08)            |
| Polarization.l1     | <b>-0.26</b> (0.03)*** | <b>-0.30</b> (0.03)*** |
| Valence.l1          | <b>0.12</b> (0.03)***  | <b>0.12</b> (0.03)***  |
| Transactions.l1     | <b>-0.08</b> (0.04)*   | -0.07 (0.04)           |
| ExchangeVolume.l1   | 0.07 (0.04)            | 0.06 (0.04)            |
| Downloads.l1        | 0.02 (0.03)            | 0.02 (0.03)            |
| Search.l1           | 0.04 (0.05)            | 0.02 (0.05)            |
| const               | 0.01 (0.06)            | 0.01 (0.06)            |
| trend               | 0.00 (0.00)            | -0.00 (0.00)           |
| Return.l2           |                        | 0.30 (0.44)            |
| Tweets.l2           |                        | -0.02 (0.07)           |
| Polarization.l2     |                        | <b>-0.18</b> (0.03)*** |
| Valence.l2          |                        | <b>0.08</b> (0.03)**   |
| Transactions.l2     |                        | 0.02 (0.04)            |
| ExchangeVolume.l2   |                        | -0.07 (0.04)           |
| Downloads.l2        |                        | 0.00 (0.03)            |
| Search.l2           |                        | 0.04 (0.06)            |
| R <sup>2</sup>      | 0.10                   | 0.14                   |
| Adj. R <sup>2</sup> | 0.09                   | 0.13                   |
| Num. obs.           | 1065                   | 1064                   |
| RMSE                | 0.99                   | 0.97                   |

\*\*\*  $p < 0.001$ , \*\*  $p < 0.01$ , \*  $p < 0.05$

Table 6: Results for Polarization equation

## Response of Valence

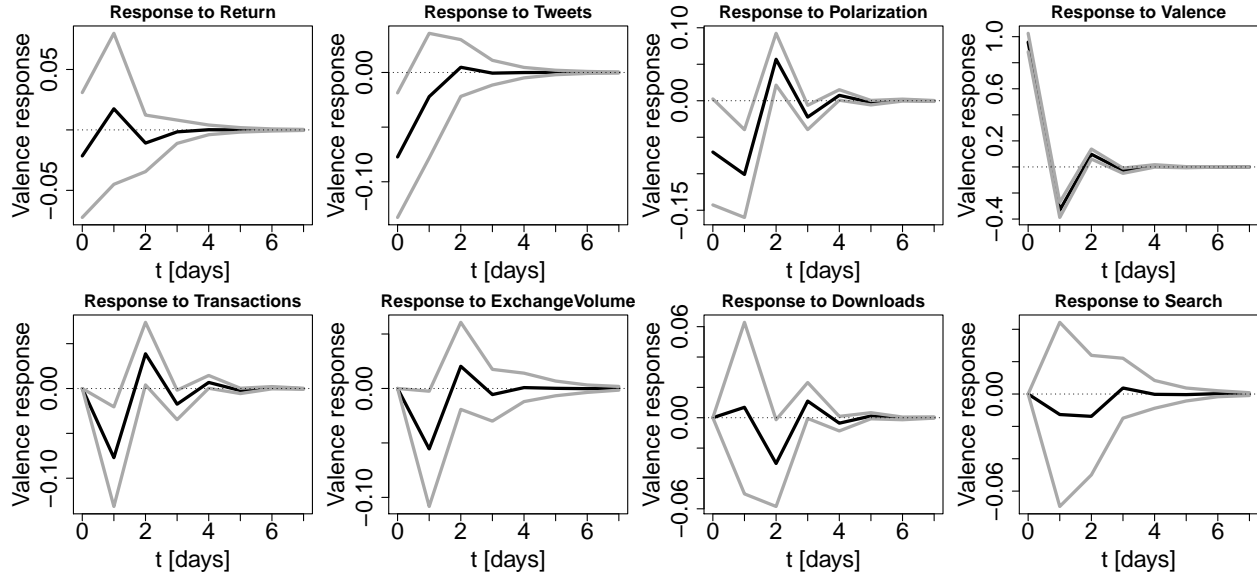

|                     | VAR(1)                             | VAR(opt)                           |
|---------------------|------------------------------------|------------------------------------|
| Return.l1           | -0.09 (0.43)                       | 0.04 (0.40)                        |
| Tweets.l1           | -0.06 (0.06)                       | -0.09 (0.07)                       |
| Polarization.l1     | <b>-0.11</b> (0.03) <sup>***</sup> | <b>-0.09</b> (0.03) <sup>**</sup>  |
| Valence.l1          | <b>-0.35</b> (0.03) <sup>***</sup> | <b>-0.47</b> (0.03) <sup>***</sup> |
| Transactions.l1     | <b>-0.08</b> (0.04) <sup>*</sup>   | <b>-0.08</b> (0.03) <sup>*</sup>   |
| ExchangeVolume.l1   | -0.07 (0.04)                       | -0.05 (0.04)                       |
| Downloads.l1        | 0.01 (0.03)                        | 0.02 (0.03)                        |
| Search.l1           | -0.02 (0.05)                       | -0.02 (0.05)                       |
| const               | -0.01 (0.06)                       | -0.02 (0.06)                       |
| trend               | 0.00 (0.00)                        | 0.00 (0.00)                        |
| Return.l2           |                                    | -0.17 (0.41)                       |
| Tweets.l2           |                                    | -0.03 (0.07)                       |
| Polarization.l2     |                                    | -0.04 (0.03)                       |
| Valence.l2          |                                    | <b>-0.36</b> (0.03) <sup>***</sup> |
| Transactions.l2     |                                    | 0.03 (0.03)                        |
| ExchangeVolume.l2   |                                    | -0.02 (0.04)                       |
| Downloads.l2        |                                    | 0.02 (0.03)                        |
| Search.l2           |                                    | -0.03 (0.05)                       |
| R <sup>2</sup>      | 0.14                               | 0.25                               |
| Adj. R <sup>2</sup> | 0.13                               | 0.24                               |
| Num. obs.           | 1065                               | 1064                               |
| RMSE                | 0.96                               | 0.90                               |

\*\*\*  $p < 0.001$ , \*\*  $p < 0.01$ , \*  $p < 0.05$

Table 7: Results for Valence equation

## Response of BC Transactions

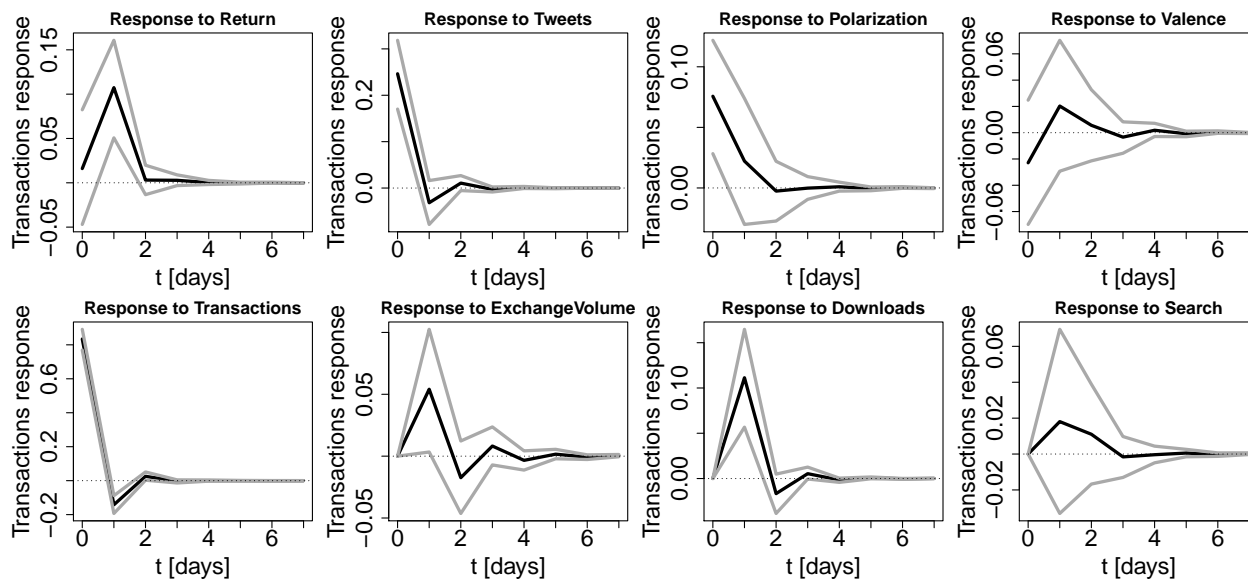

|                     | VAR(1)                             | VAR(opt)                           |
|---------------------|------------------------------------|------------------------------------|
| Return.l1           | <b>1.52</b> (0.39) <sup>***</sup>  | <b>1.51</b> (0.38) <sup>***</sup>  |
| Tweets.l1           | -0.06 (0.06)                       | -0.02 (0.07)                       |
| Polarization.l1     | 0.02 (0.03)                        | 0.02 (0.03)                        |
| Valence.l1          | 0.01 (0.03)                        | 0.01 (0.03)                        |
| Transactions.l1     | <b>-0.19</b> (0.03) <sup>***</sup> | <b>-0.24</b> (0.03) <sup>***</sup> |
| ExchangeVolume.l1   | 0.04 (0.03)                        | 0.05 (0.04)                        |
| Downloads.l1        | <b>0.10</b> (0.03) <sup>**</sup>   | <b>0.09</b> (0.03) <sup>**</sup>   |
| Search.l1           | 0.03 (0.05)                        | 0.05 (0.05)                        |
| const               | -0.01 (0.05)                       | -0.01 (0.05)                       |
| trend               | -0.00 (0.00)                       | -0.00 (0.00)                       |
| Return.l2           |                                    | 0.32 (0.38)                        |
| Tweets.l2           |                                    | -0.08 (0.06)                       |
| Polarization.l2     |                                    | 0.02 (0.03)                        |
| Valence.l2          |                                    | 0.02 (0.03)                        |
| Transactions.l2     |                                    | <b>-0.23</b> (0.03) <sup>***</sup> |
| ExchangeVolume.l2   |                                    | 0.03 (0.04)                        |
| Downloads.l2        |                                    | -0.04 (0.03)                       |
| Search.l2           |                                    | 0.03 (0.05)                        |
| R <sup>2</sup>      | 0.06                               | 0.12                               |
| Adj. R <sup>2</sup> | 0.05                               | 0.11                               |
| Num. obs.           | 1065                               | 1064                               |
| RMSE                | 0.87                               | 0.85                               |

\*\*\*  $p < 0.001$ , \*\*  $p < 0.01$ , \*  $p < 0.05$

Table 8: Results for Transactions equation

## Response of FX Volume

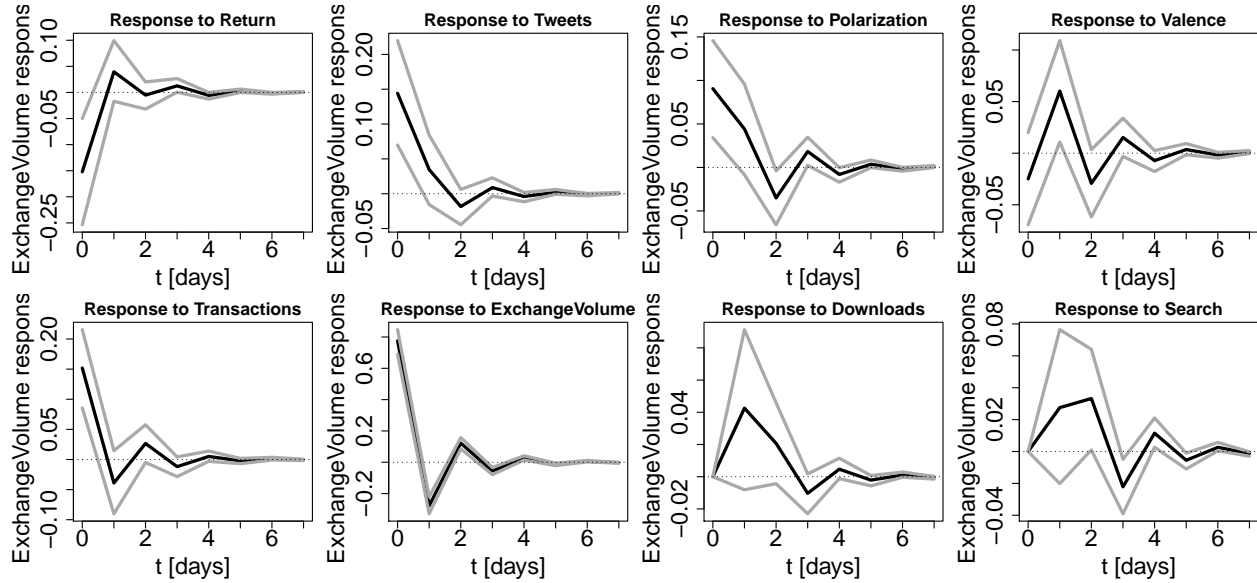

|                     | VAR(1)                | VAR(opt)              |
|---------------------|-----------------------|-----------------------|
| Return.l1           | -0.19 (0.36)          | -0.23 (0.35)          |
| Tweets.l1           | <b>0.15</b> (0.05)**  | <b>0.17</b> (0.06)**  |
| Polarization.l1     | <b>0.08</b> (0.02)**  | <b>0.09</b> (0.03)**  |
| Valence.l1          | <b>0.05</b> (0.02)*   | <b>0.06</b> (0.03)*   |
| Transactions.l1     | 0.01 (0.03)           | 0.03 (0.03)           |
| ExchangeVolume.l1   | <b>-0.38</b> (0.03)** | <b>-0.46</b> (0.03)** |
| Downloads.l1        | 0.02 (0.03)           | 0.02 (0.03)           |
| Search.l1           | 0.05 (0.04)           | 0.04 (0.04)           |
| const               | 0.01 (0.05)           | 0.01 (0.05)           |
| trend               | -0.00 (0.00)          | -0.00 (0.00)          |
| Return.l2           |                       | -0.12 (0.36)          |
| Tweets.l2           |                       | <b>-0.16</b> (0.06)** |
| Polarization.l2     |                       | 0.01 (0.03)           |
| Valence.l2          |                       | <b>0.05</b> (0.03)*   |
| Transactions.l2     |                       | 0.03 (0.03)           |
| ExchangeVolume.l2   |                       | <b>-0.26</b> (0.03)** |
| Downloads.l2        |                       | 0.03 (0.03)           |
| Search.l2           |                       | 0.05 (0.05)           |
| R <sup>2</sup>      | 0.15                  | 0.21                  |
| Adj. R <sup>2</sup> | 0.14                  | 0.20                  |
| Num. obs.           | 1065                  | 1064                  |
| RMSE                | 0.82                  | 0.80                  |

\*\*\* $p < 0.001$ , \*\* $p < 0.01$ , \* $p < 0.05$

Table 9: Results for ExchangeVolume equation



## Response of Downloads

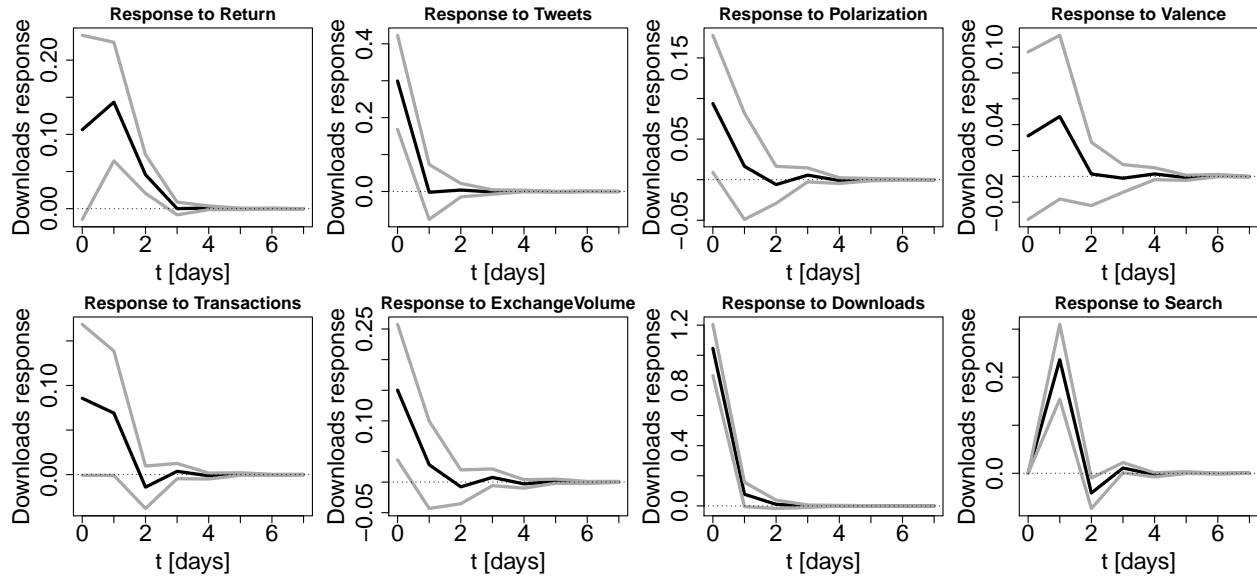

|                     | VAR(1)                             | VAR(opt)                           |
|---------------------|------------------------------------|------------------------------------|
| Return.l1           | <b>2.13</b> (0.49) <sup>***</sup>  | <b>2.30</b> (0.49) <sup>***</sup>  |
| Tweets.l1           | <b>-0.35</b> (0.07) <sup>***</sup> | <b>-0.35</b> (0.08) <sup>***</sup> |
| Polarization.l1     | -0.02 (0.03)                       | -0.03 (0.03)                       |
| Valence.l1          | 0.04 (0.03)                        | 0.03 (0.04)                        |
| Transactions.l1     | 0.04 (0.04)                        | 0.06 (0.04)                        |
| ExchangeVolume.l1   | -0.06 (0.04)                       | -0.02 (0.05)                       |
| Downloads.l1        | -0.07 (0.04)                       | <b>-0.08</b> (0.04) <sup>*</sup>   |
| Search.l1           | <b>0.41</b> (0.06) <sup>***</sup>  | <b>0.43</b> (0.06) <sup>***</sup>  |
| const               | -0.01 (0.07)                       | -0.01 (0.07)                       |
| trend               | -0.00 (0.00)                       | -0.00 (0.00)                       |
| Return.l2           |                                    | -0.43 (0.49)                       |
| Tweets.l2           |                                    | <b>-0.17</b> (0.08) <sup>*</sup>   |
| Polarization.l2     |                                    | <b>-0.08</b> (0.03) <sup>*</sup>   |
| Valence.l2          |                                    | -0.02 (0.04)                       |
| Transactions.l2     |                                    | 0.07 (0.04)                        |
| ExchangeVolume.l2   |                                    | 0.07 (0.05)                        |
| Downloads.l2        |                                    | <b>-0.15</b> (0.04) <sup>***</sup> |
| Search.l2           |                                    | -0.01 (0.06)                       |
| R <sup>2</sup>      | 0.07                               | 0.11                               |
| Adj. R <sup>2</sup> | 0.06                               | 0.10                               |
| Num. obs.           | 1065                               | 1064                               |
| RMSE                | 1.11                               | 1.09                               |

\*\*\*  $p < 0.001$ , \*\*  $p < 0.01$ , \*  $p < 0.05$

Table 10: Results for Downloads equation

# Response of Search

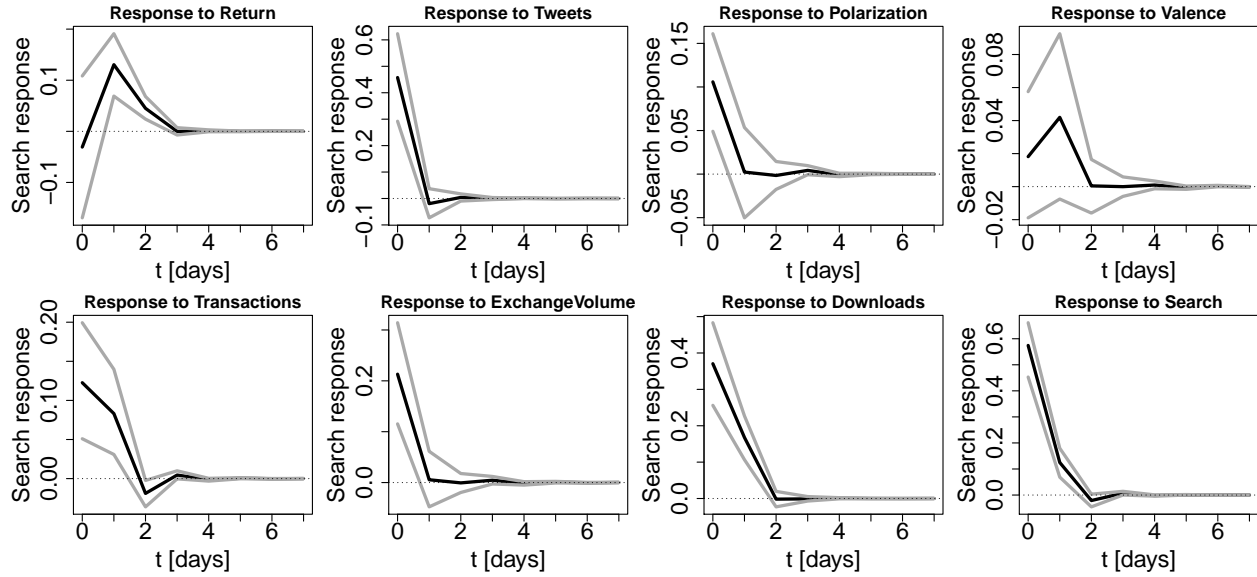

|                     | VAR(1)                             | VAR(opt)                           |
|---------------------|------------------------------------|------------------------------------|
| Return.l1           | <b>1.60</b> (0.38) <sup>***</sup>  | <b>1.65</b> (0.37) <sup>***</sup>  |
| Tweets.l1           | <b>-0.31</b> (0.06) <sup>***</sup> | <b>-0.19</b> (0.06) <sup>**</sup>  |
| Polarization.l1     | -0.03 (0.03)                       | -0.02 (0.03)                       |
| Valence.l1          | 0.04 (0.03)                        | 0.03 (0.03)                        |
| Transactions.l1     | <b>0.07</b> (0.03) <sup>*</sup>    | 0.06 (0.03)                        |
| ExchangeVolume.l1   | <b>-0.07</b> (0.03) <sup>*</sup>   | -0.03 (0.03)                       |
| Downloads.l1        | <b>0.08</b> (0.03) <sup>**</sup>   | <b>0.12</b> (0.03) <sup>***</sup>  |
| Search.l1           | <b>0.22</b> (0.05) <sup>***</sup>  | <b>0.17</b> (0.04) <sup>***</sup>  |
| const               | -0.02 (0.05)                       | -0.02 (0.05)                       |
| trend               | 0.00 (0.00)                        | 0.00 (0.00)                        |
| Return.l2           |                                    | -0.12 (0.38)                       |
| Tweets.l2           |                                    | -0.06 (0.06)                       |
| Polarization.l2     |                                    | -0.04 (0.03)                       |
| Valence.l2          |                                    | -0.00 (0.03)                       |
| Transactions.l2     |                                    | 0.05 (0.03)                        |
| ExchangeVolume.l2   |                                    | <b>0.10</b> (0.03) <sup>**</sup>   |
| Downloads.l2        |                                    | <b>0.06</b> (0.03) <sup>*</sup>    |
| Search.l2           |                                    | <b>-0.33</b> (0.05) <sup>***</sup> |
| R <sup>2</sup>      | 0.09                               | 0.16                               |
| Adj. R <sup>2</sup> | 0.08                               | 0.15                               |
| Num. obs.           | 1065                               | 1064                               |
| RMSE                | 0.87                               | 0.83                               |

\*\*\* $p < 0.001$ , \*\* $p < 0.01$ , \* $p < 0.05$

Table 11: Results for Search equation

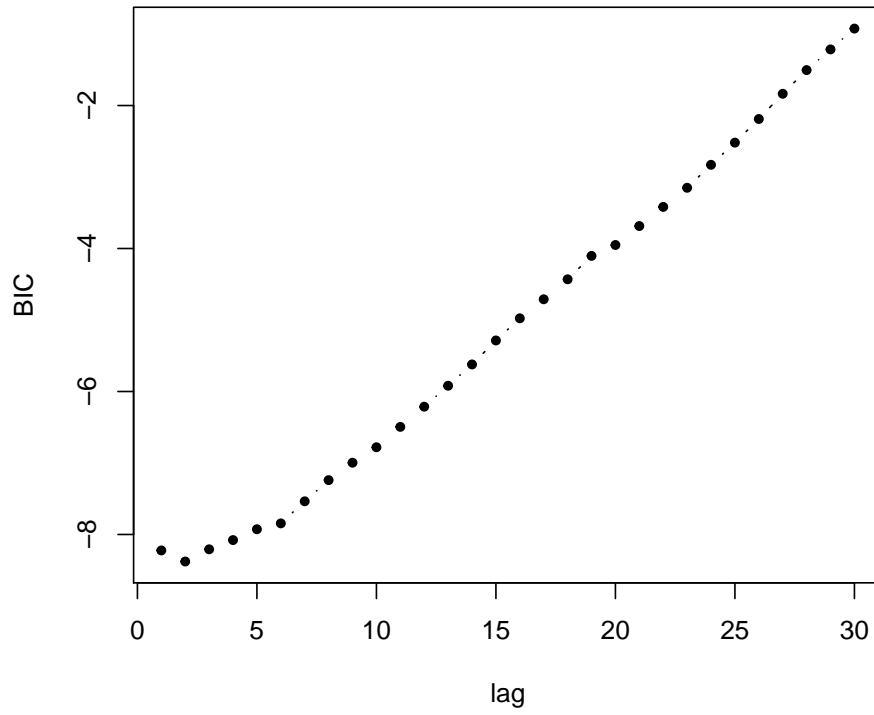

Figure 3: Bayesian Information Criterion for VAR fits of increasing lags.

# Impulse Response Functions

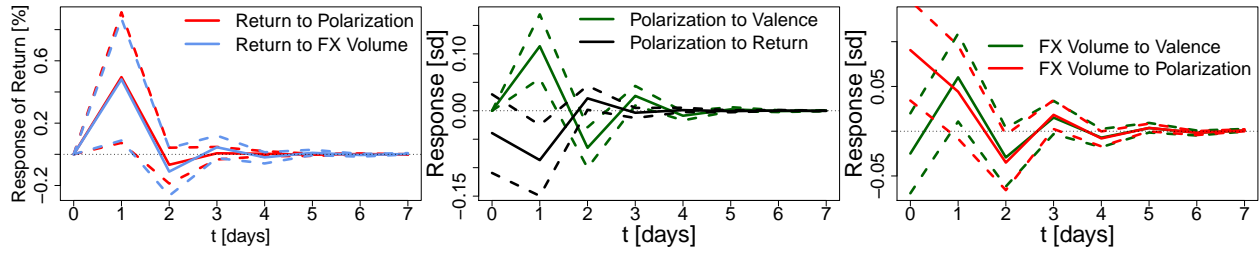

Figure 4: Significant impulse response functions of Return (left), Polarization (center) and FX Volume (right). Solid lines show HAC corrected estimates, dashed lines show bootstrapping 95% confidence intervals.

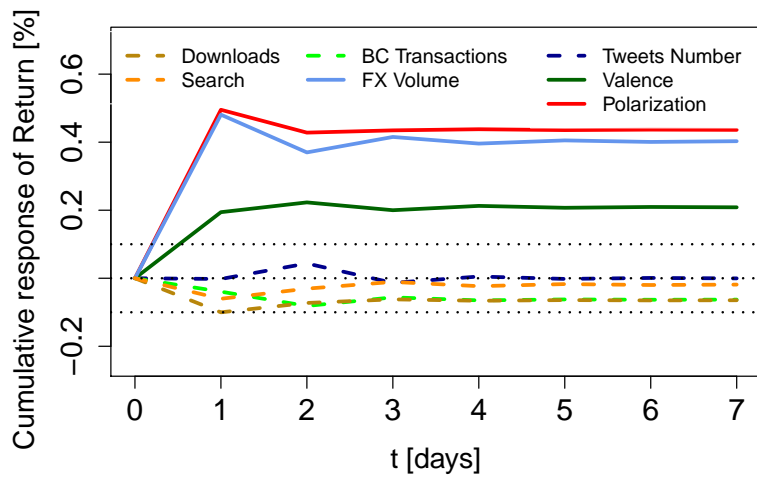

Figure 5: Cumulative impulse response functions of Return. Solid lines show sizable responses beyond  $\pm 0.1\%$ .

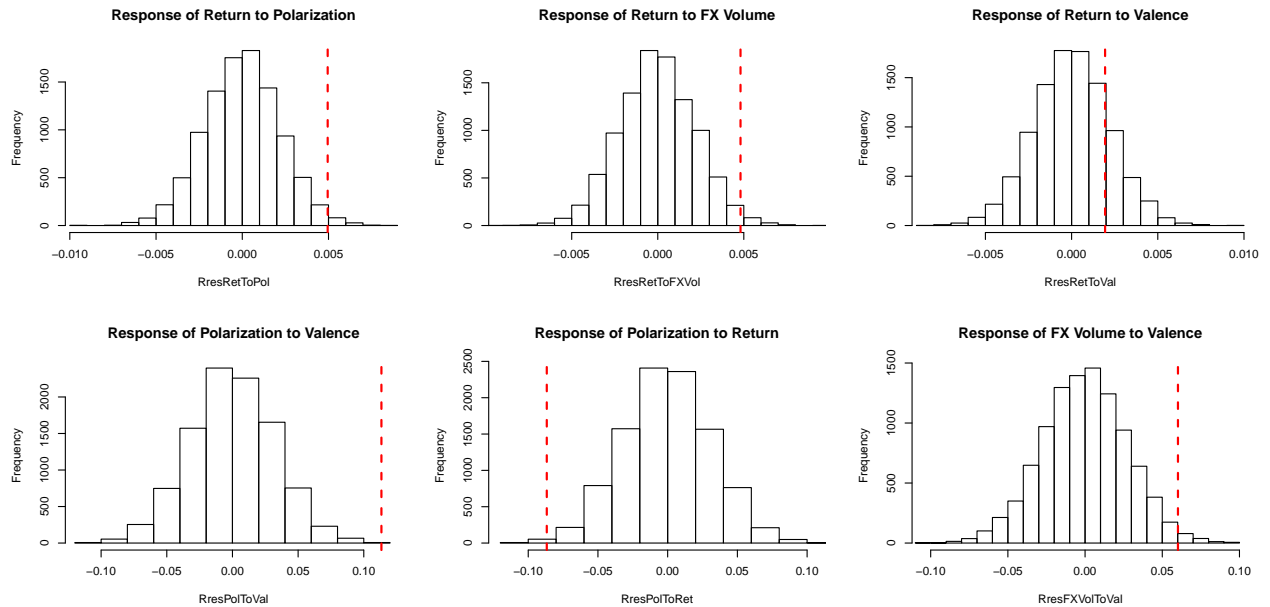

Figure 6: Results of Monte Carlo tests for the identified responses.

## Trading Strategies Time Series

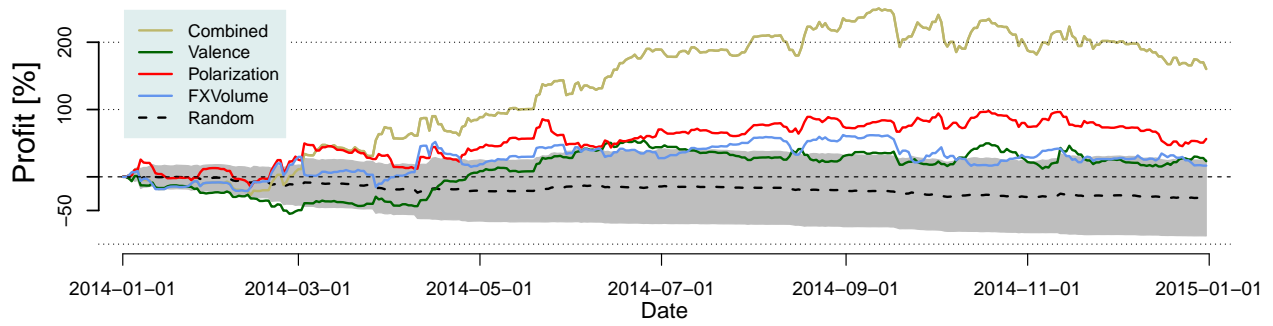

Figure 7: Time series of strategy cumulative returns. Shaded area shows one standard deviation around the random strategy.

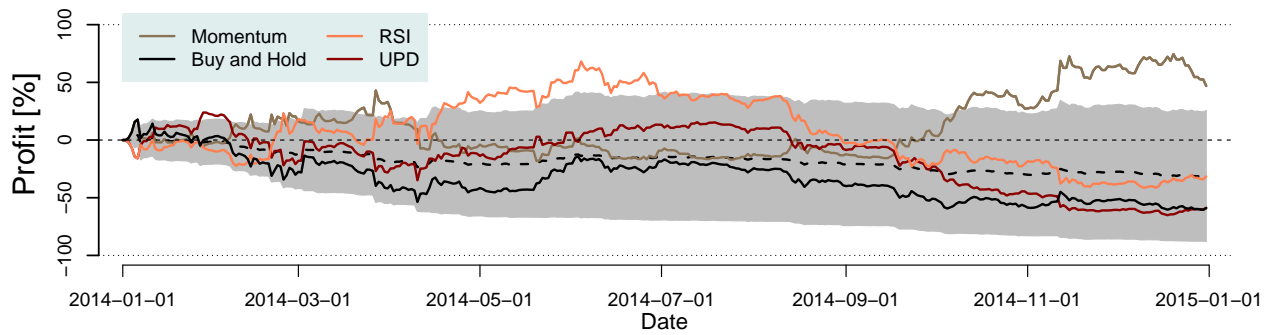

Figure 8: Time series of technical analysis cumulative returns.

# Strategy Evaluation

|         | Combined | Buy&Hold | Pol    | Val    | FX Vol | MOM    | UPD     | RSI     | DJIA   | Rnd     |
|---------|----------|----------|--------|--------|--------|--------|---------|---------|--------|---------|
| SR      | 1.7653   | -0.7741  | 1.0120 | 0.6410 | 0.5738 | 0.9146 | -0.8990 | -0.1772 | 0.7995 | -1.6590 |
| $\mu_R$ | 0.3229   | -0.1635  | 0.1779 | 0.1183 | 0.1082 | 0.1625 | -0.1736 | -0.0346 | 0.0345 | -0.0963 |

Table 12: Sharpe Ratios and mean daily returns of strategies (%)

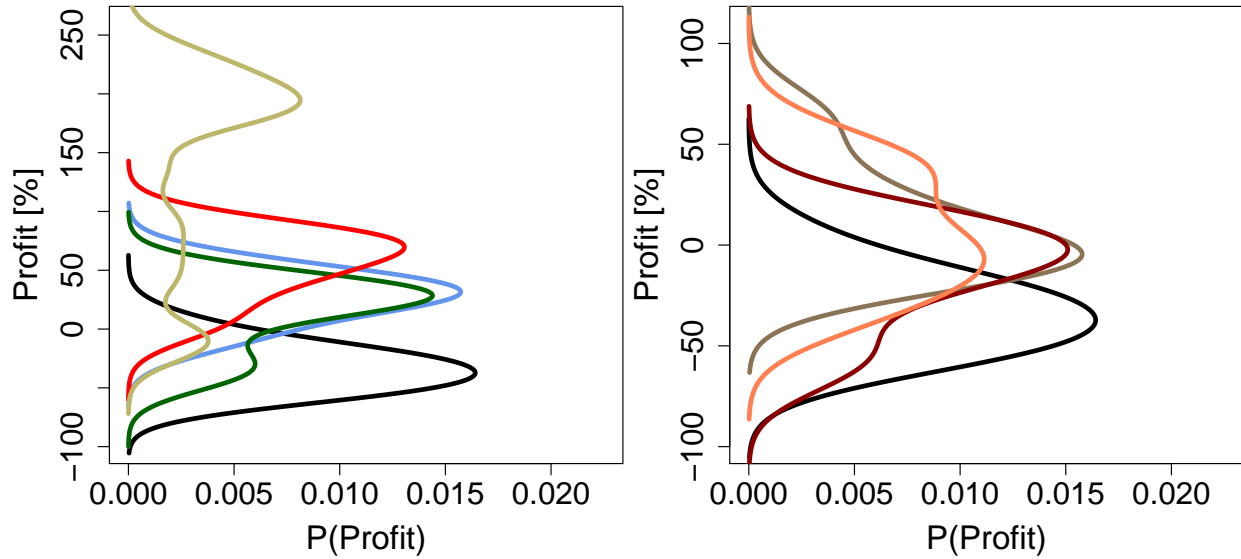

Figure 9: Kernel Density Plot of cumulative returns of data-driven and technical analysis strategies.

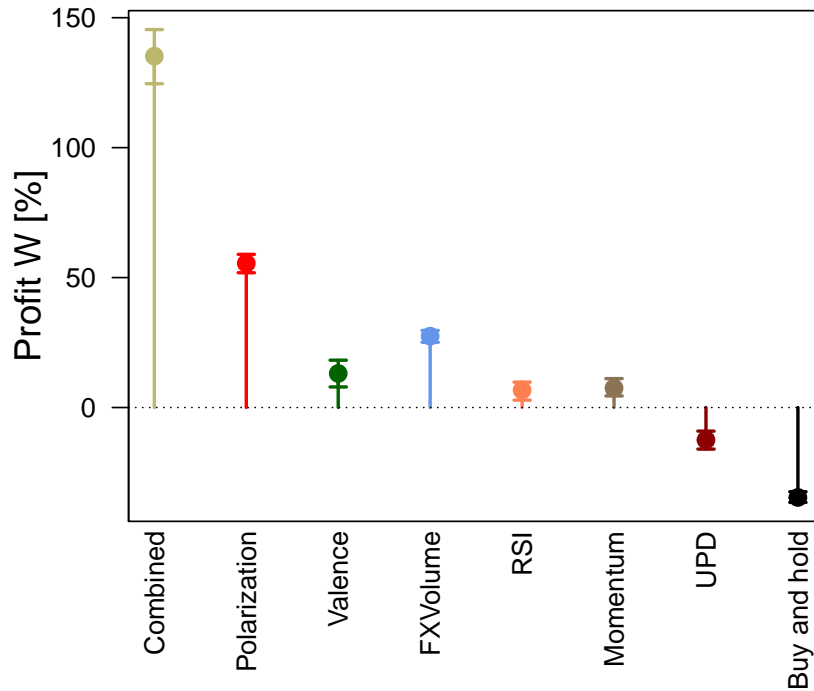

Figure 10: Wilcoxon estimates of cumulative returns.

## Costs analysis

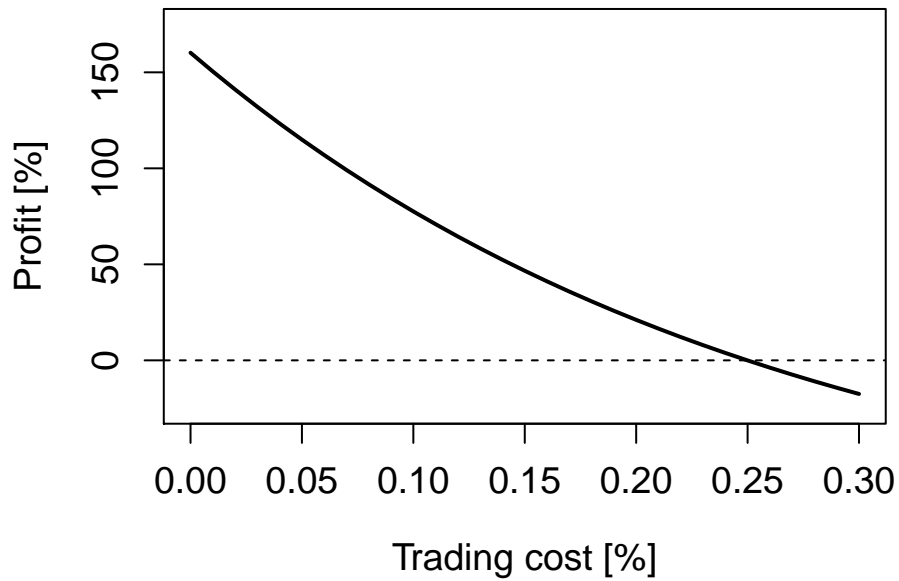

Figure 11: Final cumulative returns depending on transaction costs.

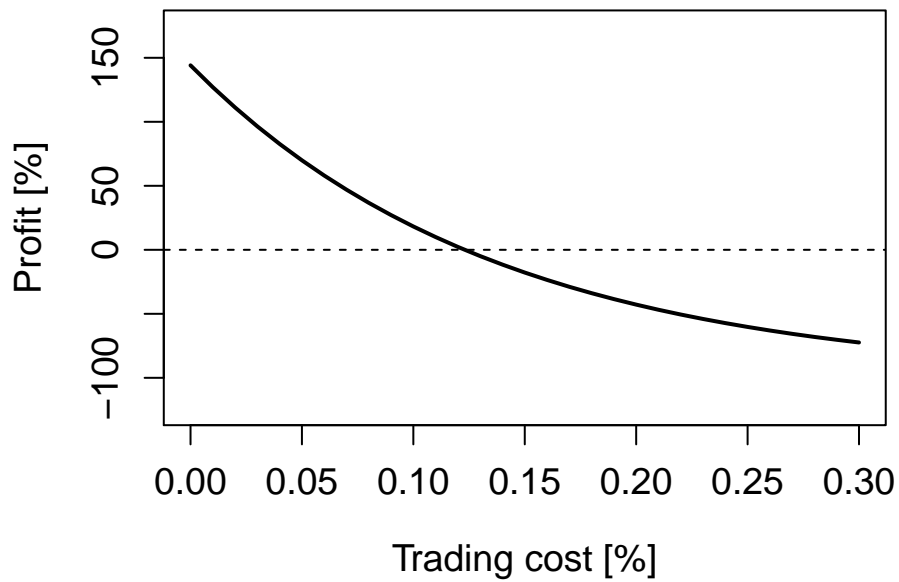

Figure 12: Final cumulative returns depending on transaction costs, for daily closing positions.

# Risk Analysis

| signal  | ADF          | ADFpval    | PP            | PPpval     | KSP        | KSPpval    | AR          |
|---------|--------------|------------|---------------|------------|------------|------------|-------------|
| Returns | -14.87932971 | 0.00000000 | -391.64898133 | 0.01000000 | 0.28793772 | 0.10000000 | -0.07966048 |

Table 13: Stationarity tests for instantaneous returns of Combined

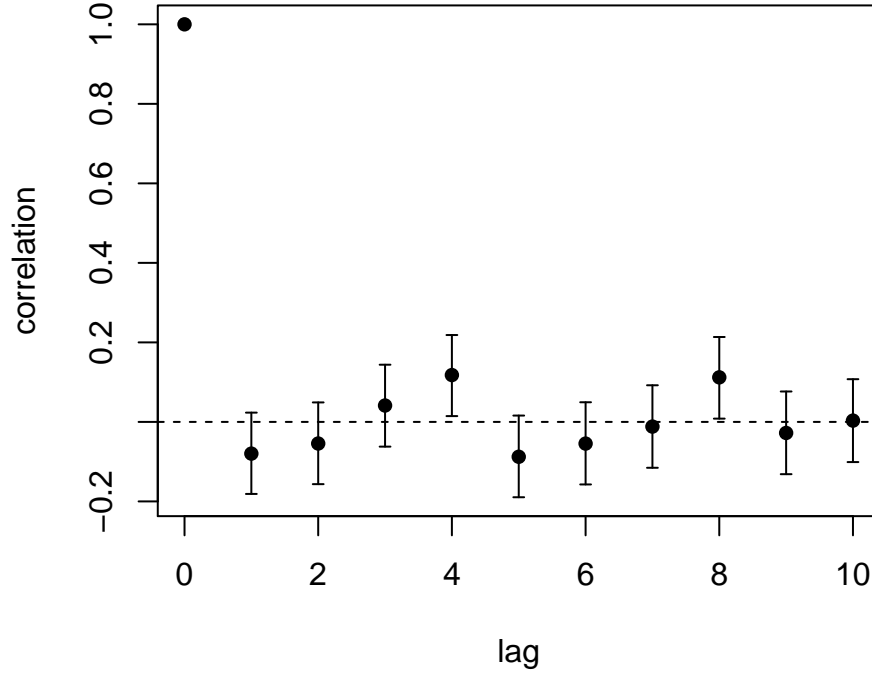

Figure 13: Autocorrelation function of Combined strategy returns

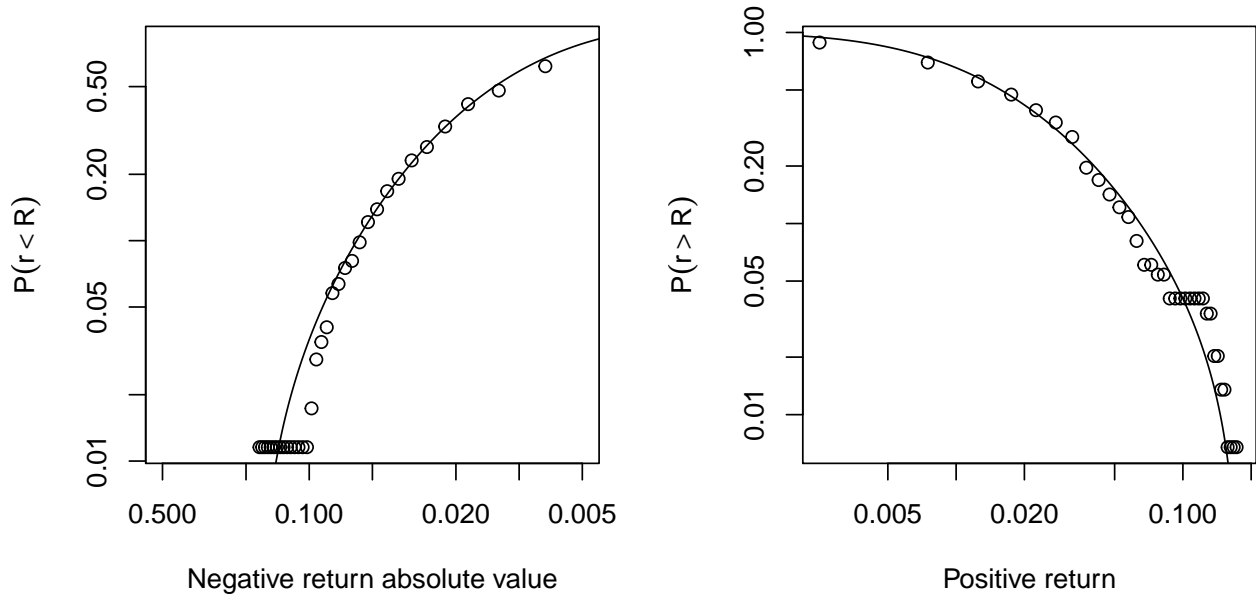

Figure 14: Distribution of Returns of Combined Strategy. The line shows the ML estimate of a lognormal fit.



- Negative Returns
  - meanlog:  $-4.30209144$  ( $0.09442549$ )
  - sdlog:  $1.24197346$  ( $0.06676891$ )
  - KS Distance:  $0.066764$  (p-value =  $0.4236$ )
- Positive Returns
  - meanlog:  $-4.11858870$  ( $0.09595619$ )
  - sdlog:  $1.16735747$  ( $0.06785127$ )
  - KS Distance:  $0.070967$  (p-value =  $0.4453$ )

## Only short/long combined strategy evaluation

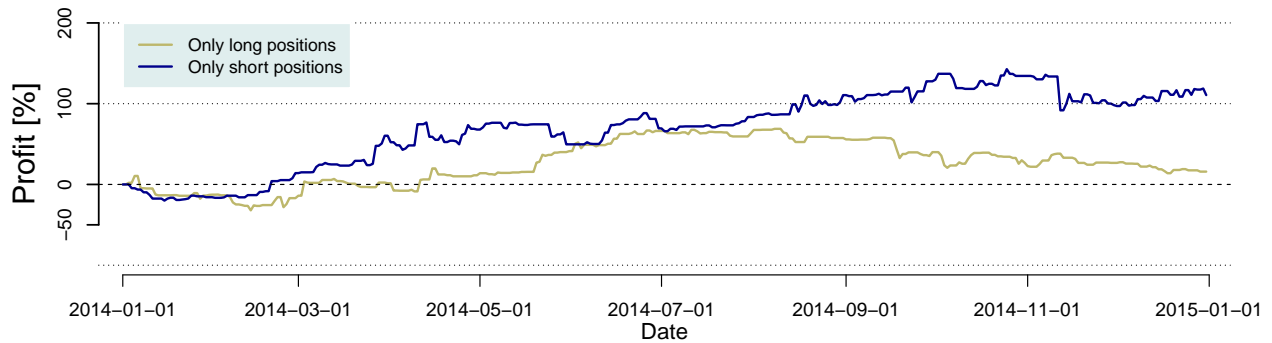

Figure 15: Time series of Combined cumulative returns when using only long and only short positions.

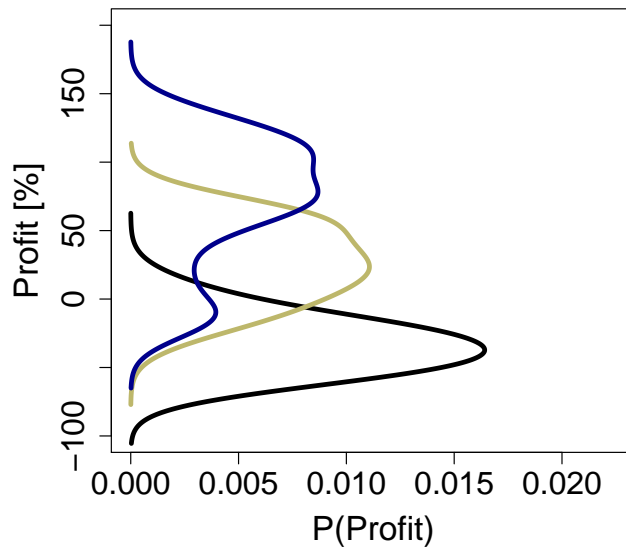

Figure 16: Kernel Density Plot of cumulative returns of data-driven strategies.
